# Supplementary material for: Anti-lipolysis-stimulated lipoprotein receptor monoclonal antibody as a novel therapeutic agent for endometrial cancer
Source: PubMed Central journal article supplement (PMC9210735; doi:10.1186/s12885-022-09789-6), 2022-06-21

**Supplemental Figure S3. Original data of western blot bands used in Figure 3, Figure 4, and Supplemental Figure S2.**

**A. Western blot bands of LSR (i) and GAPDH (ii) after transfection of control-siRNA or LSR-siRNA in HEC1 cells (Original data of Figure 3A).**

Red boxes denote the regions of original blots used in Figure 3A. Arrows indicate the edge of the membrane. Abbreviations: C, Control-siRNA; L, LSR-siRNA.

**(i) LSR (65 kDa)**

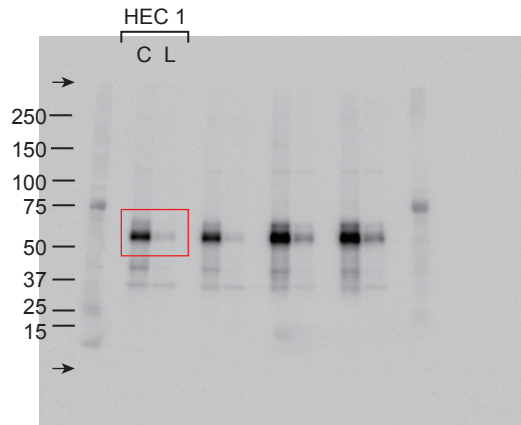

**(ii) GAPDH (37 kDa)**

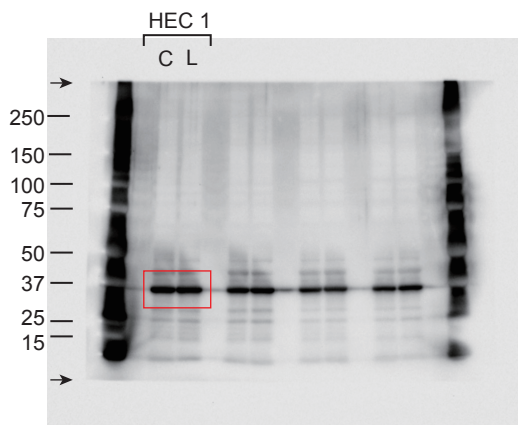

**B. Western blot bands of LSR (i) and GAPDH (ii) after transfection of control-siRNA or LSR-siRNA in HEC116 cells (Original data of Figure 3A).**

Red boxes denote the regions of original blots used in Figure 3A. Arrows indicate the edge of the membrane. Abbreviations: C, Control-siRNA; L, LSR-siRNA.

**(i) LSR (65 kDa)**

**(ii) GAPDH (37 kDa)**

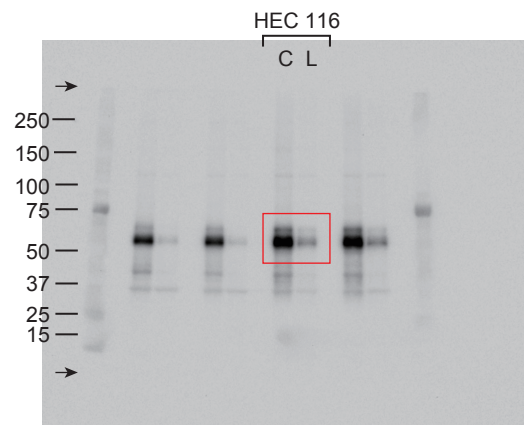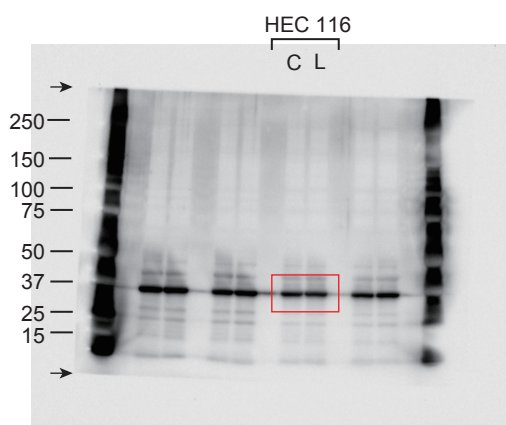

**C. Western blot bands of LSR (i), phospho-MEK1/2 (ii), MEK1/2 (iii), phospho-ERK1/2 (iv), ERK1/2 (v), phospho-p90RSK (vi), p90RSK (vii), and GAPDH (viii) after transfection of control-siRNA or LSR-siRNA in HEC1 cells (Original data of Figure 3C).**

Red boxes denote the regions of original blots used in Figure 3C. Arrows indicate the edge of the membrane. Abbreviations: C, Control-siRNA; L, LSR-siRNA.

**(i) LSR (65 kDa)**

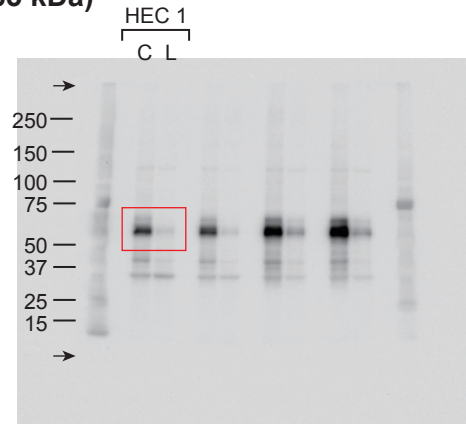

**(ii) phospho-MEK1/2 (45 kDa)**

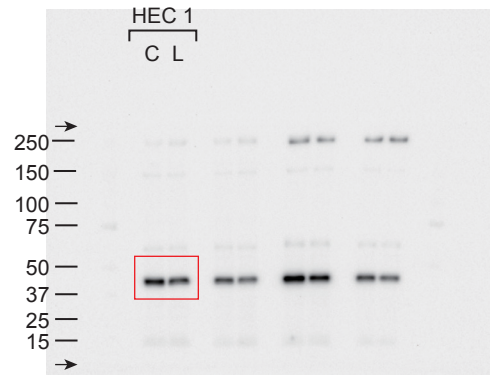

***long-exposure blot***

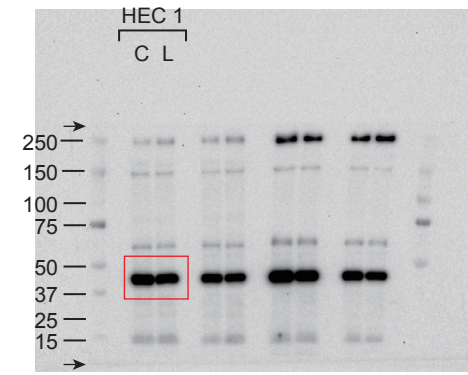

**(iii) MEK1/2 (45 kDa)**

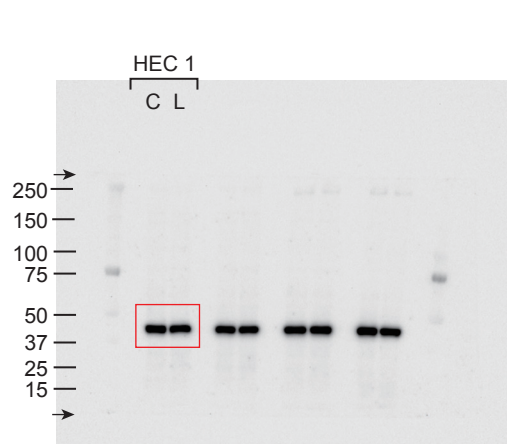

***long-exposure blot***

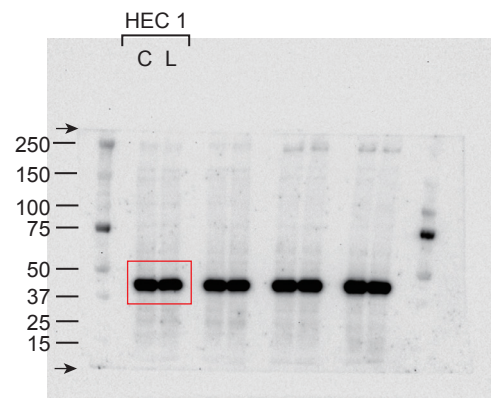

**(iv) phospho-ERK1/2 (42,44 kDa)**

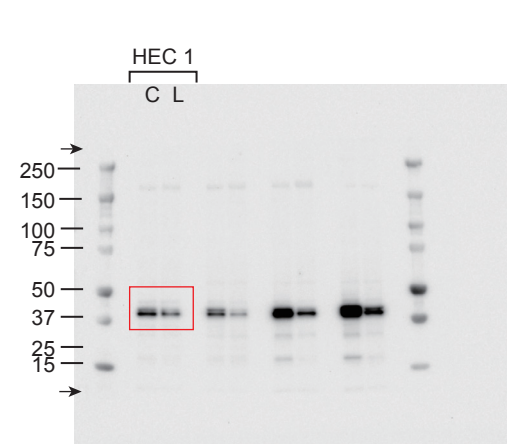

***long-exposure blot***

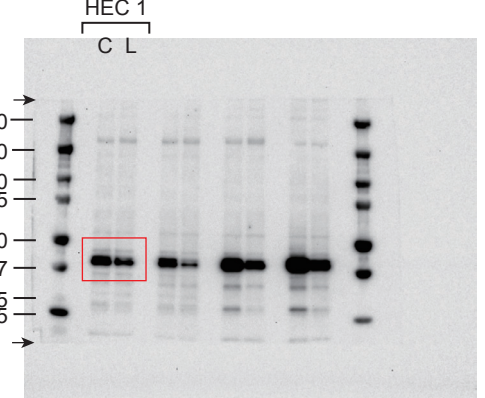

**(v) ERK1/2 (42,44 kDa)**

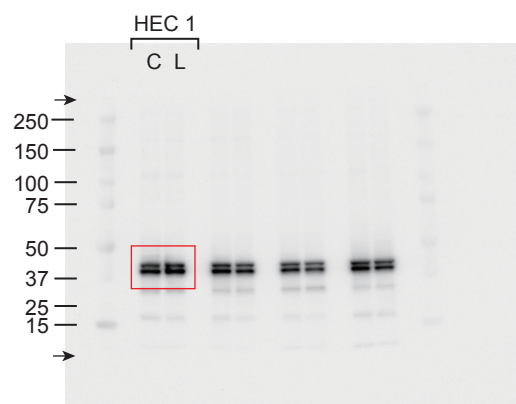

***long-exposure blot***

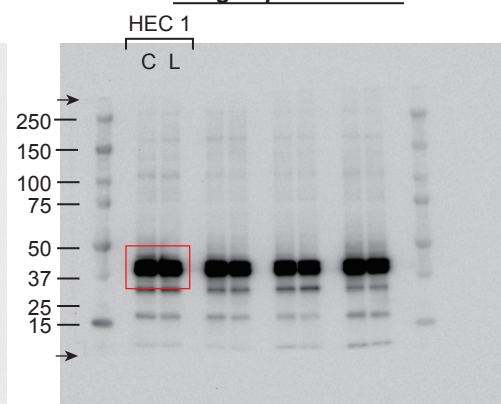

**(vi) phospho-p90RSK (90 kDa)**

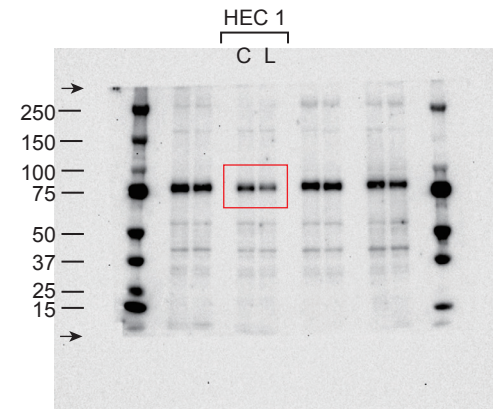

(vii) p90RSK (90 kDa)

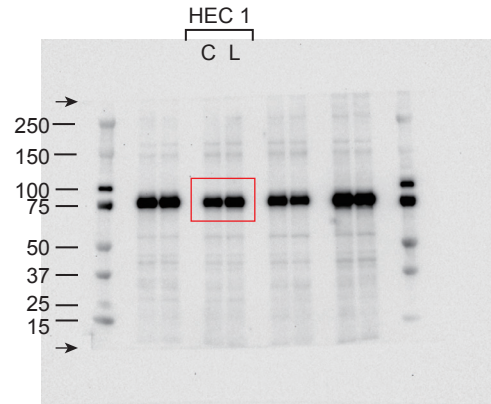

(viii) GAPDH (37 kDa)

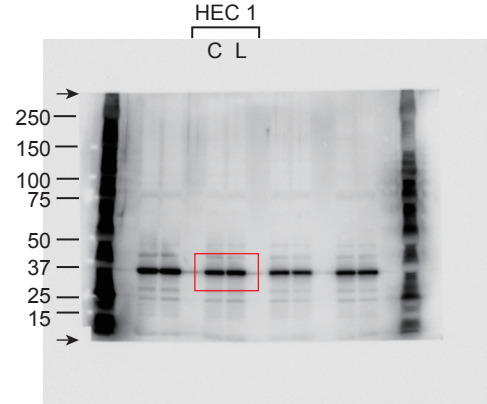

**D. Western blot bands of LSR (i), phospho-MEK1/2 (ii), MEK1/2 (iii), phospho-ERK1/2 (iv), ERK1/2 (v), phospho-p90RSK (vi), p90RSK (vii), and GAPDH (viii) after transfection of control-siRNA or LSR-siRNA in HEC116 cells (Original data of Figure 3C).**

Red boxes denote the regions of original blots used in Figure 3C. Arrows indicate the edge of the membrane. Abbreviations: C, Control-siRNA; L, LSR-siRNA.

**(i) LSR (65 kDa)**

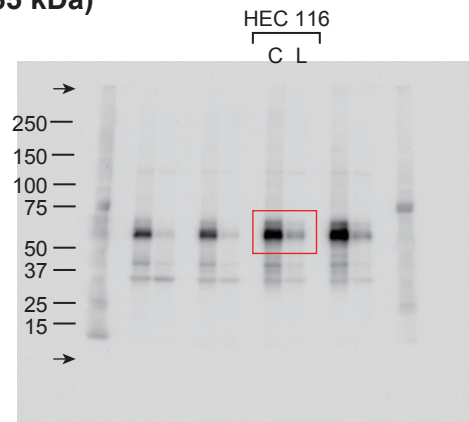

**(ii) phospho-MEK1/2 (45 kDa)**

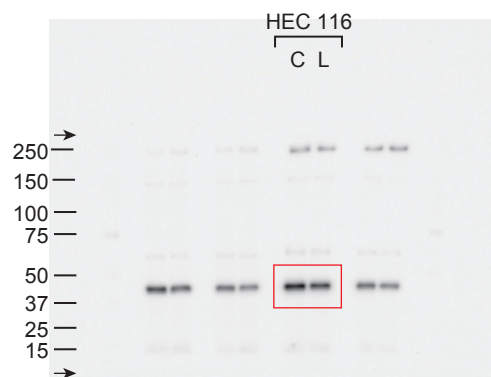

*long-exposure blot*

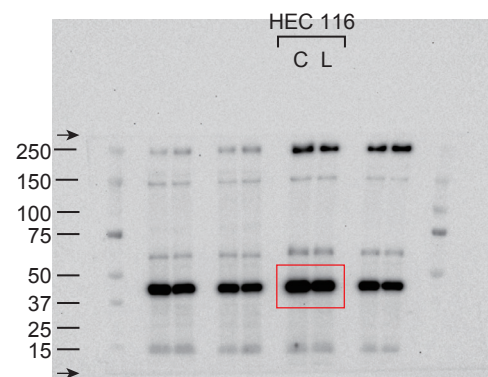

**(iii) MEK1/2 (45 kDa)**

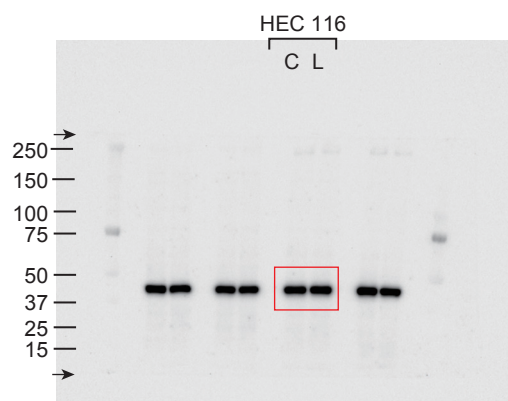

*long-exposure blot*

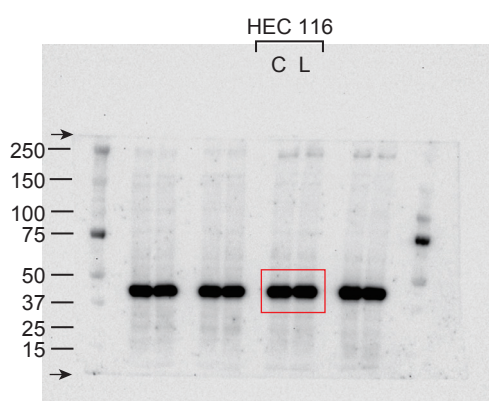

**(iv) phospho-ERK1/2 (42,44 kDa)**

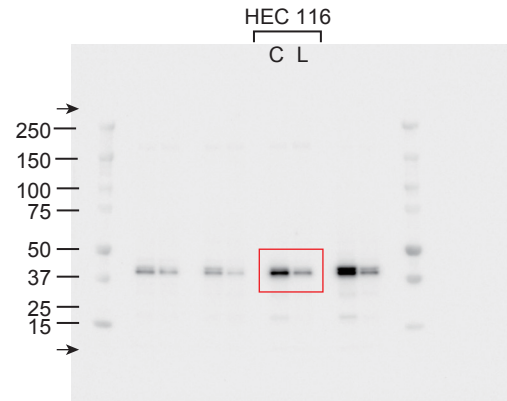

*long-exposure blot*

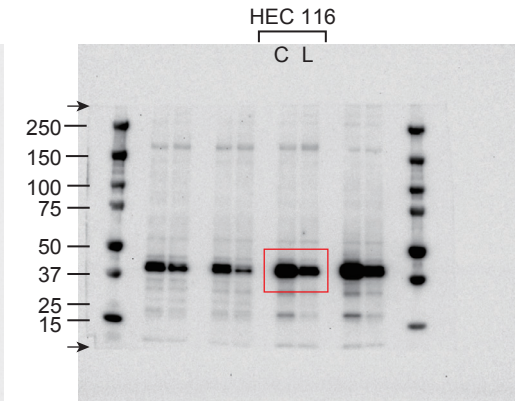

**(v) ERK1/2 (42,44 kDa)**

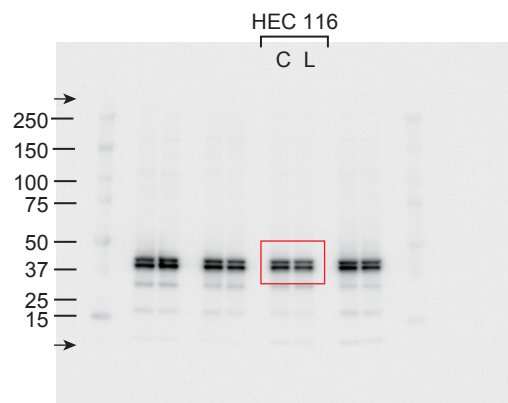

*long-exposure blot*

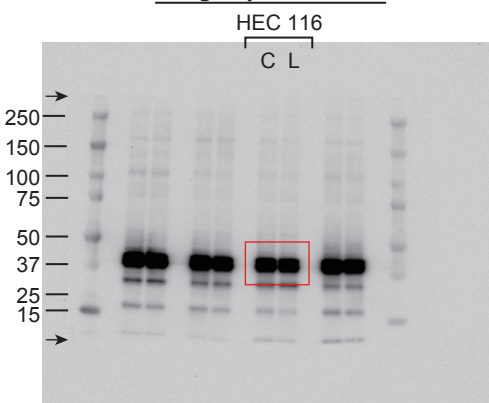

**(vi) phospho-p90RSK (90 kDa)**

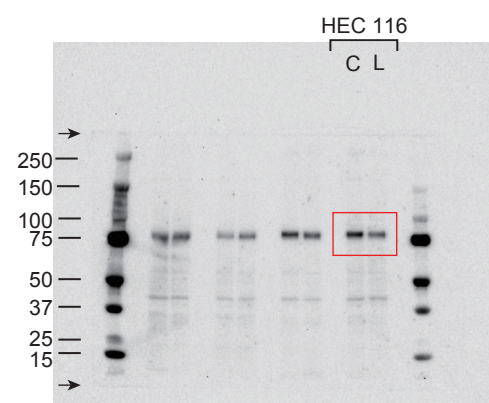

(vii) p90RSK (90 kDa)

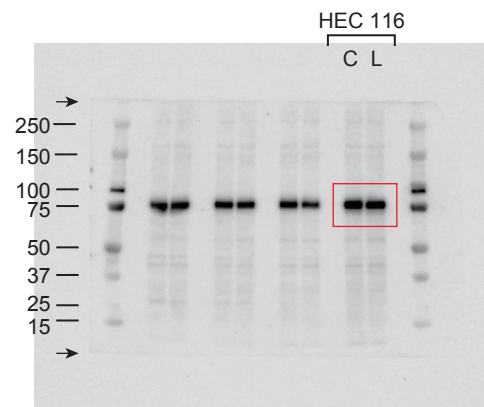

(viii) GAPDH (37 kDa)

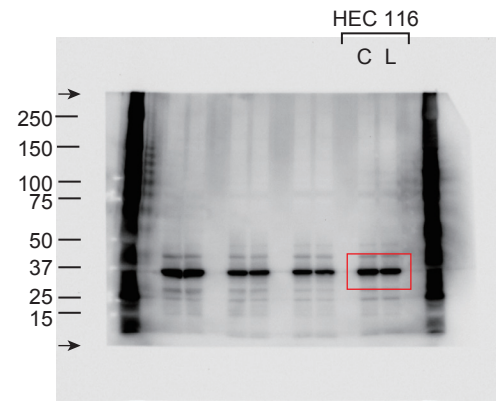

**E. Western blot bands of LSR (i), MT1-MMP (ii), MMP2 (iii), and GAPDH (iv) after transfection of control-siRNA or LSR-siRNA in HEC1 cells (Original data of Figure 4D).**

Red boxes denote the regions of original blots used in Figure 4D. Arrows indicate the edge of the membrane. Abbreviations: C, Control-siRNA; L, LSR-siRNA.

**(i) LSR (65 kDa)**

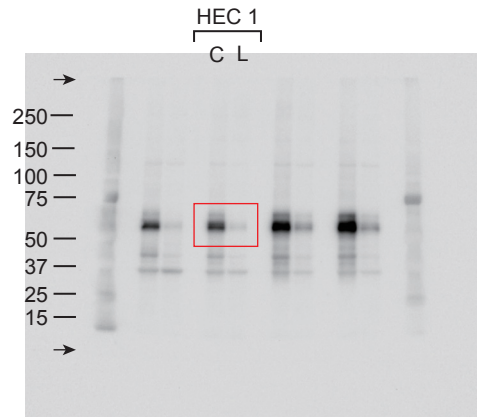

**(ii) MT1-MMP (50,62 kDa)**

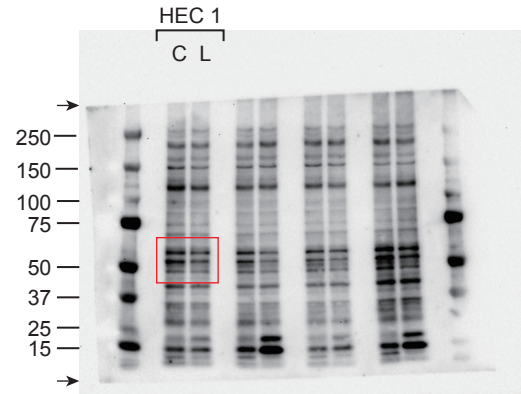

**(iii) MMP2 (72 kDa)**

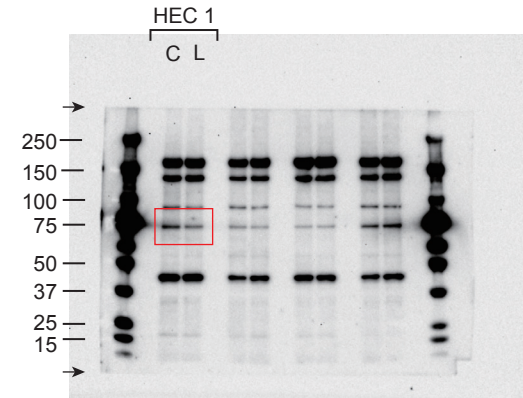

**(iv) GAPDH (37 kDa)**

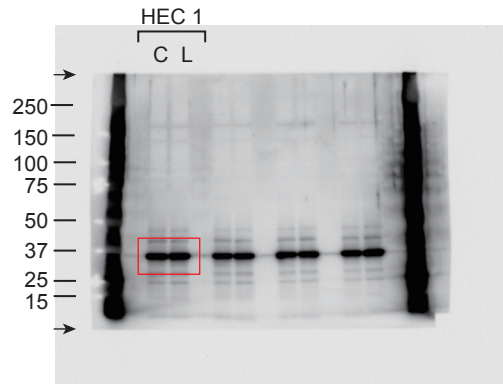

**F. Western blot bands of LSR (i), MT1-MMP (ii), MMP2 (iii), and GAPDH (iv) after transfection of control-siRNA or LSR-siRNA in HEC116 cells (Original data of Figure 4D).**

Red boxes denote the regions of original blots used in Figure 4D. Arrows indicate the edge of the membrane. Abbreviations: C, Control-siRNA; L, LSR-siRNA.

**(i) LSR (65 kDa)**

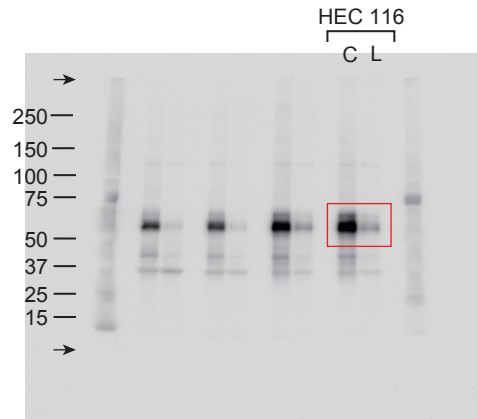

**(ii) MT1-MMP (50,62 kDa)**

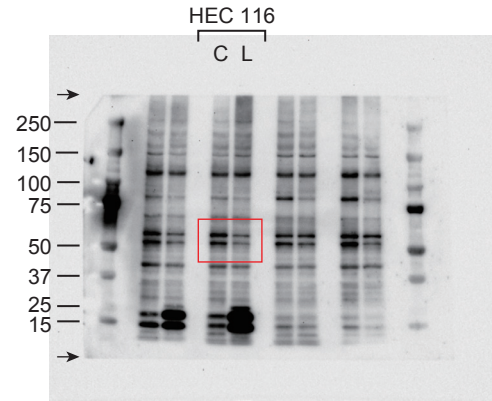

**(iii) MMP2 (72 kDa)**

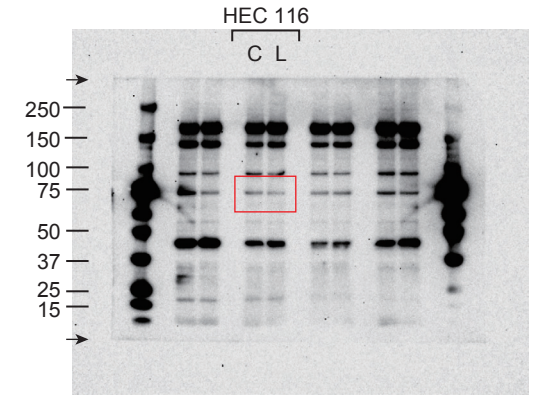

**(iv) GAPDH (37 kDa)**

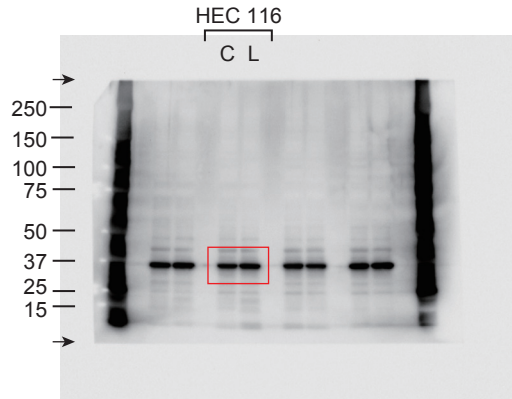



**G. Western blot bands of LSR (i), phospho-ERK1/2 (ii), ERK1/2 (iii), MT1-MMP (iv), MMP2 (v), and GAPDH (vi) after transfection of control-siRNA or ERK1/2-siRNA in HEC1 cells (Original data of Figure 4G).**

Red boxes denote the regions of original blots used in Figure 4G. Arrows indicate the edge of the membrane. Abbreviations: C, Control-siRNA; E, ERK1/2-siRNA.

**(i) LSR (65 kDa)**

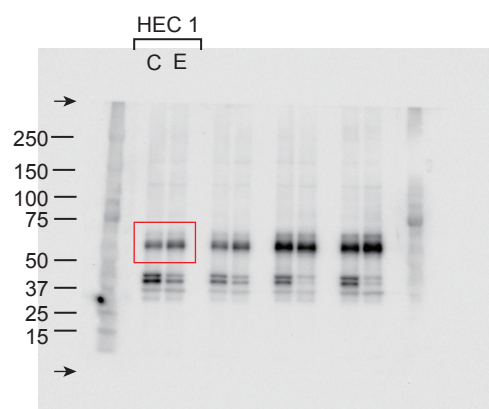

**(ii) phospho-ERK1/2 (42,44 kDa)**

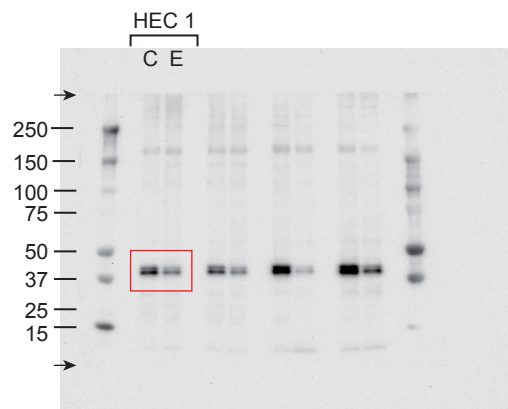

**(iii) ERK1/2 (42,44 kDa)**

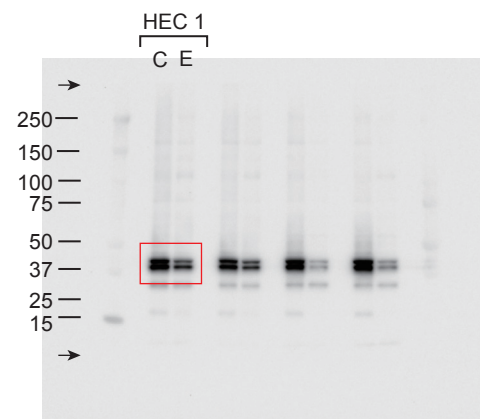

*long-exposure blot*

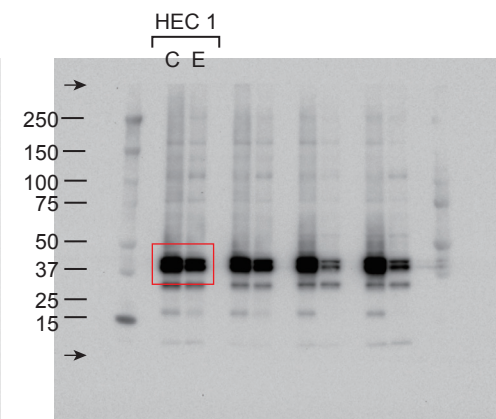

**(iv) MT1-MMP (50,62 kDa)**

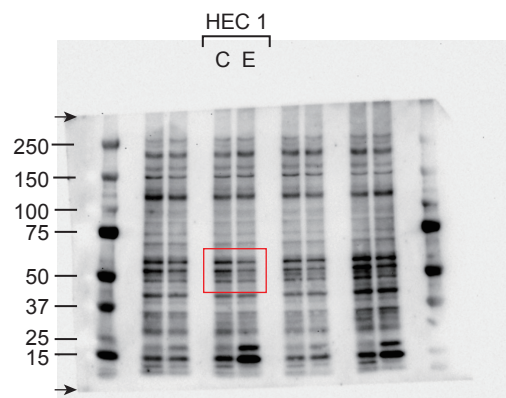

**(v) MMP2 (72 kDa)**

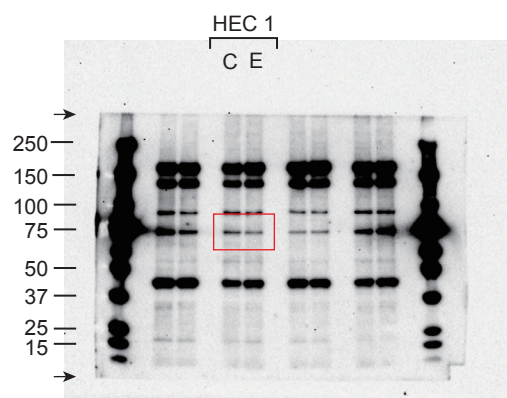

**(vi) GAPDH (37 kDa)**

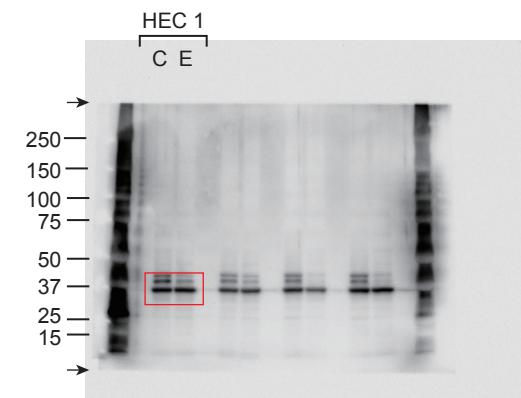

**H. Western blot bands of LSR (i), phospho-ERK1/2 (ii), ERK1/2 (iii), MT1-MMP (iv), MMP2 (v), and GAPDH (vi) after transfection of control-siRNA or ERK1/2-siRNA in HEC116 cells (Original data of Figure 4G).**

Red boxes denote the regions of original blots used in Figure 4G. Arrows indicate the edge of the membrane. Abbreviations: C, Control-siRNA; E, ERK1/2-siRNA.

**(i) LSR (65 kDa)**

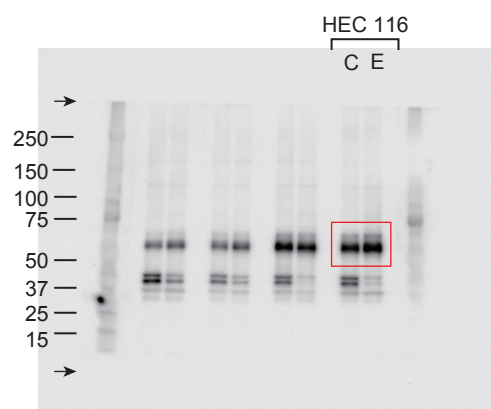

**(ii) phospho-ERK1/2 (42,44 kDa)**

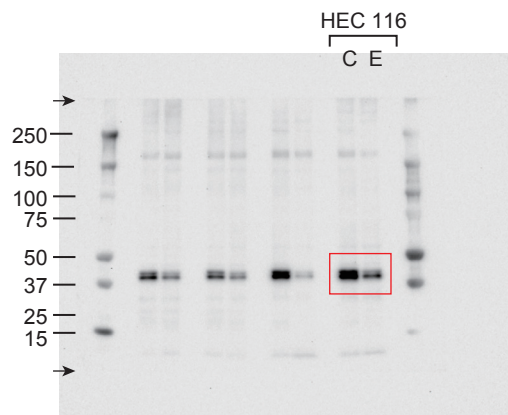

**(iii) ERK1/2 (42,44 kDa)**

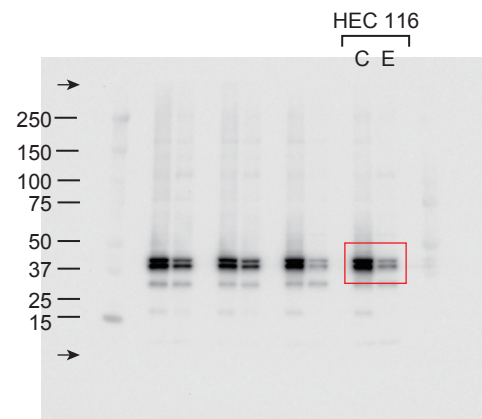

*long-exposure blot*

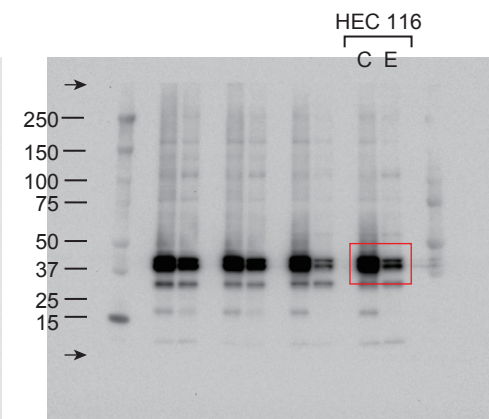

**(iv) MT1-MMP (50,62 kDa)**

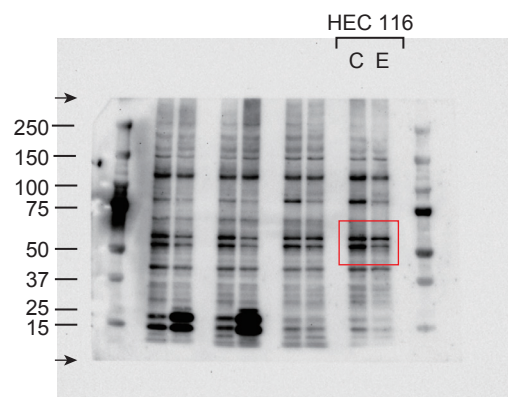

**(v) MMP2 (72 kDa)**

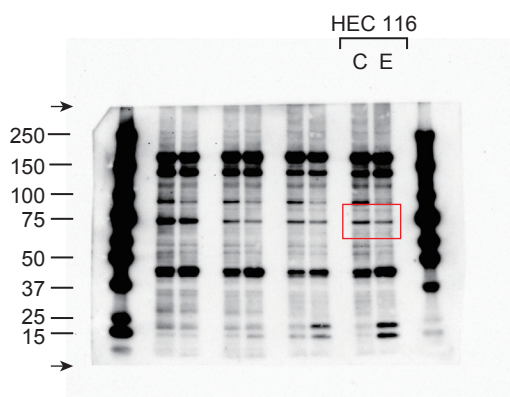

**(vi) GAPDH (37 kDa)**

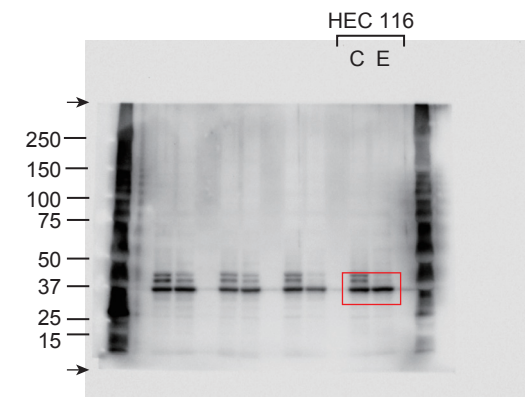

**I. Western blot bands of LSR (i), phospho-SAPK/JNK (ii), SAPK/JNK (iii), phospho-p38 MAPK (iv), p38 MAPK (v), and GAPDH (vi) after transfection of control-siRNA or LSR-siRNA in HEC1 cells (Original data of Supplemental Figure S2).**

Red boxes denote the regions of original blots used in Supplemental Figure S2. Arrows indicate the edge of the membrane. Abbreviations: C, Control-siRNA; L, LSR-siRNA.

**(i) LSR (65 kDa)**

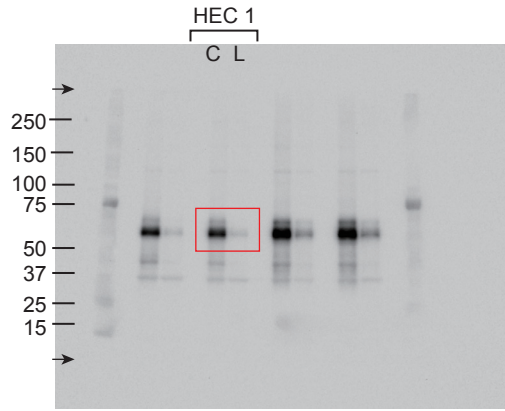

**(ii) phospho-SAPK/JNK (48,54 kDa)**

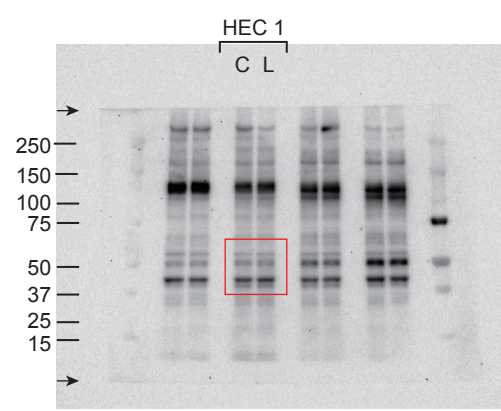

**(iii) SAPK/JNK (48,54 kDa)**

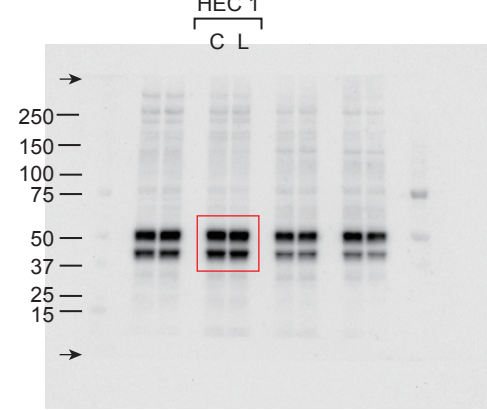

***long-exposure blot***

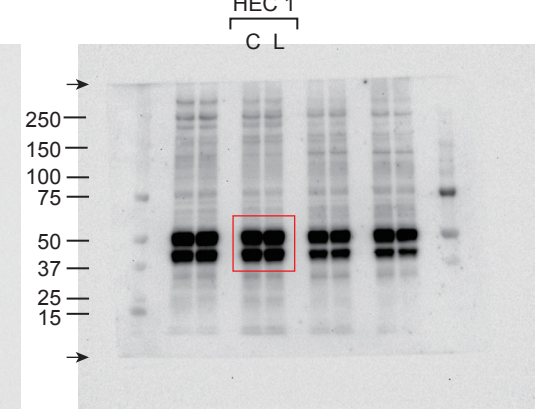

**(iv) phospho-p38 MAPK (38 kDa)**

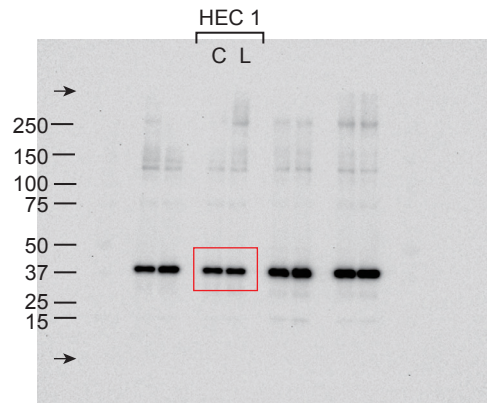

***long-exposure blot***

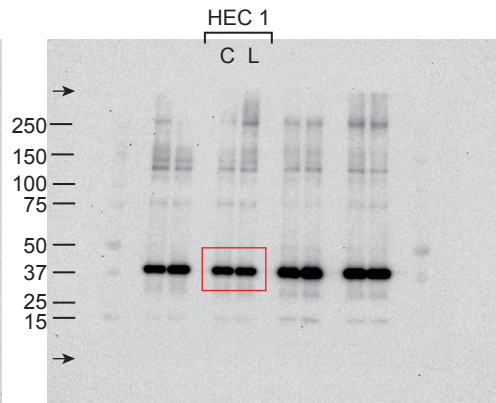

**(v) p38 MAPK (38 kDa)**

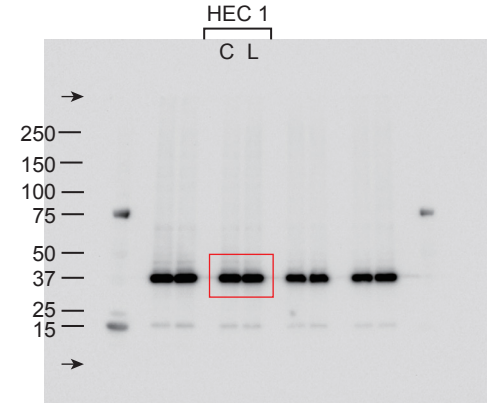

***long-exposure blot***

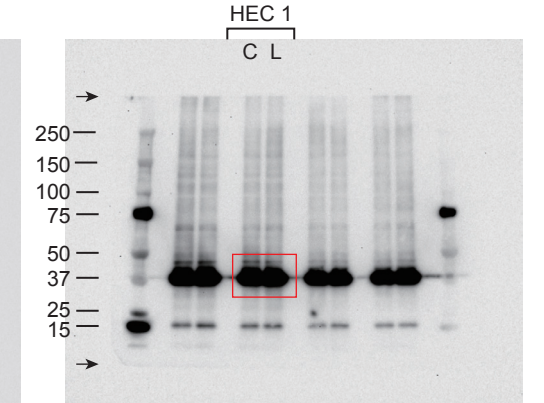

**(vi) GAPDH (37 kDa)**

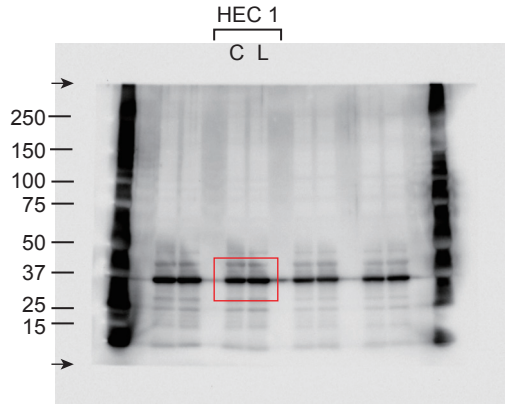

**J. Western blot bands of LSR (i), phospho-SAPK/JNK (ii), SAPK/JNK (iii), phospho-p38 MAPK (iv), p38 MAPK (v), and GAPDH (vi) after transfection of control-siRNA or LSR-siRNA in HEC116 cells (Original data of Supplemental Figure S2).**

Red boxes denote the regions of original blots used in Supplemental Figure S2. Arrows indicate the edge of the membrane. Abbreviations: C, Control-siRNA; L, LSR-siRNA.

**(i) LSR (65 kDa)**

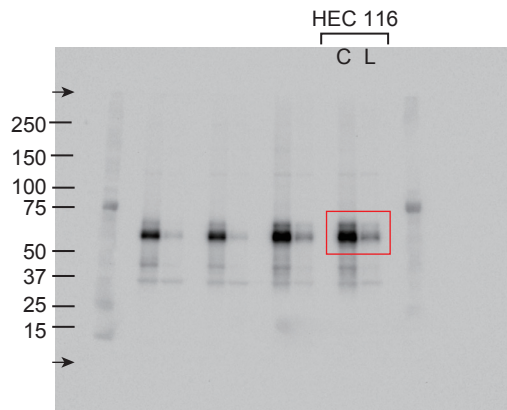

**(ii) phospho-SAPK/JNK (48,54 kDa)**

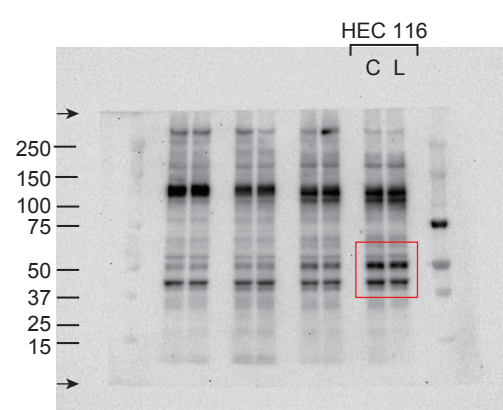

**(iii) SAPK/JNK (48,54 kDa)**

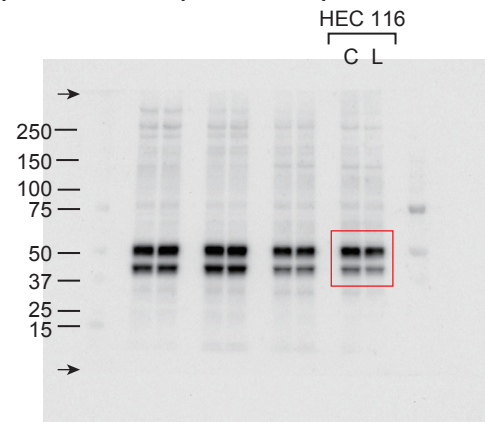

***long-exposure blot***

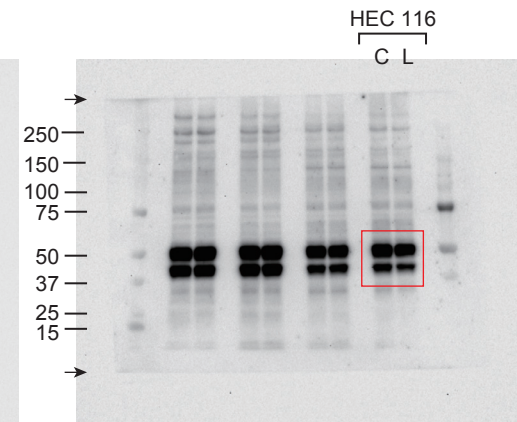

**(iv) phospho-p38 MAPK (38 kDa)**

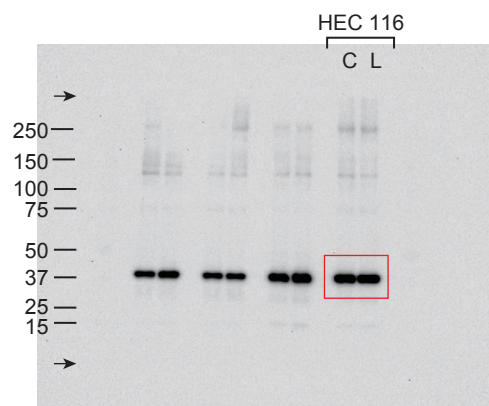

***long-exposure blot***

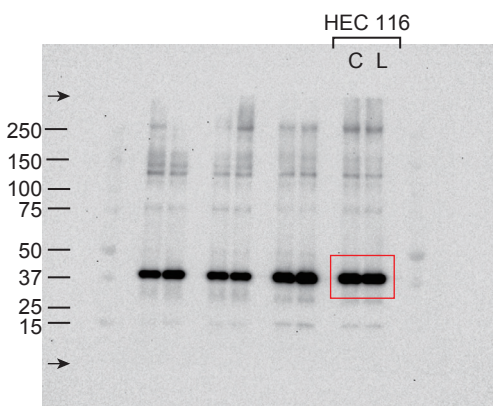

**(v) p38 MAPK (38 kDa)**

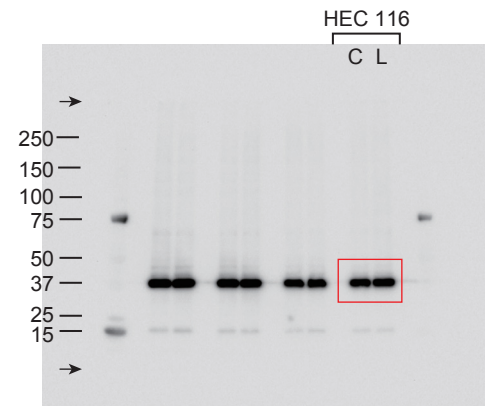

***long-exposure blot***

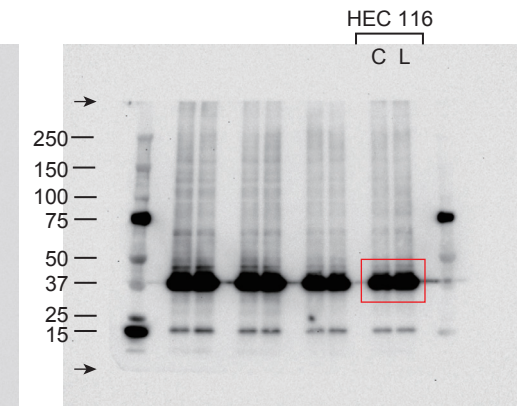

**(vi) GAPDH (37 kDa)**

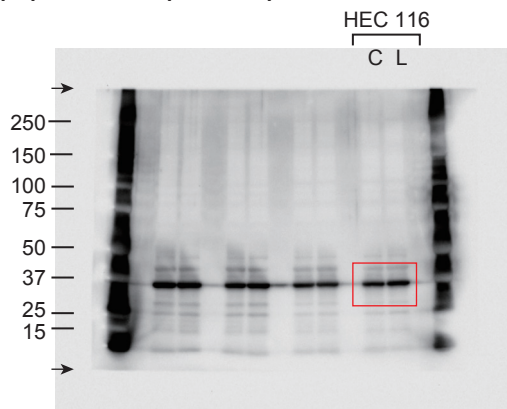

Supplement: 12885_2022_9789_MOESM3_ESM.pdf [file 12885_2022_9789_MOESM3_ESM.pdf]
